# Supplementary material for: Central metabolic responses of microorganisms to years and decades of soil warming
Source: Research Square preprint supplement (doi:10.21203/rs.3.rs-132190/v1), 2021-02-05
Supplement: Supplementary file 1 [file 0e5bfa5e2f5c7cd4b91a07aa.xlsx]

## Sheet: Supplementary data S2
KO	logFC	logCPM	F	PValue	FDR	KEGG1	KEGG2	KEGG3	enzyme	gene/unit	T	presented in / supporting
K00864	-0.48036	8.86979	11.2021	0.0037799	0.0444028	Metabolism	Lipid metabolism	Glycerolipid metabolism	glycerol kinase	glpK		Figure 5
K02316	-0.236669	9.96927	13.6022	0.00179853	0.0264516	Genetic Information Processing	Replication and repair	DNA replication	DNA primase	dnaG
K00336	0.258699	9.90606	9.3225	0.00712652	0.0631955	Metabolism	Energy metabolism	Oxidative phosphorylation	NADH-quinone oxidoreductase	nuoG		Figure 6a
K00343	0.484817	9.17617	12.8393	0.00226086	0.0317046	Metabolism	Energy metabolism	Oxidative phosphorylation	NADH-quinone oxidoreductase	nuoN
K02257	0.270431	10.2156	22.96	0.000165399	0.00677455	Metabolism	Energy metabolism	Oxidative phosphorylation	cytochrome coxidase	cyoE
						Metabolism	Metabolism of cofactors and vitamins	Porphyrin and chlorophyll metabolism	cytochrome coxidase	cyoE
K02112	0.335374	11.6512	11.689	0.00323291	0.0397846	Metabolism	Energy metabolism	Oxidative phosphorylation	ATPase	atpD
						Metabolism	Energy metabolism	Photosynthesis	ATPase	atpD
K00937	-0.22911	10.7673	11.0054	0.00402985	0.0450811	Metabolism	Energy metabolism	Oxidative phosphorylation	polyphosphate kinase	ppk		Figure 6ab
						Genetic Information Processing	Folding, sorting and degradation	RNA degradation	polyphosphate kinase	ppk
K03040	0.25903	11.5153	9.84746	0.00593886	0.0559552	Genetic Information Processing	Transcription	RNA polymerase	RNA_polymerase	rpoA		Figure 6b
K03046	0.630539	13.1967	19.492	0.00037059	0.0106412	Genetic Information Processing	Transcription	RNA polymerase	RNA_polymerase	rpoC
K02982	0.58223	10.8161	16.3706	0.000824311	0.0169046	Genetic Information Processing	Translation	Ribosome	small subunit ribosomal protein S3	RP-S3		Figure 6b
K02988	0.688678	10.1932	23.4012	0.000150065	0.00677455	Genetic Information Processing	Translation	Ribosome	small subunit ribosomal protein S5	RP-S5
K02994	0.761849	9.92221	22.7987	0.000171435	0.00677455	Genetic Information Processing	Translation	Ribosome	small subunit ribosomal protein S8	RP-S8
K02954	0.639328	9.29611	17.7321	0.000576133	0.0133619	Genetic Information Processing	Translation	Ribosome	small subunit ribosomal protein S14	RP-S14
K02961	0.66373	9.24273	18.9051	0.000428234	0.0112272	Genetic Information Processing	Translation	Ribosome	small subunit ribosomal protein S17	RP-S17
K02965	0.546552	9.73979	15.4459	0.00106102	0.0188175	Genetic Information Processing	Translation	Ribosome	small subunit ribosomal protein S19	RP-S19
K02886	0.471712	11.1175	14.8699	0.0012467	0.0214789	Genetic Information Processing	Translation	Ribosome	large subunit ribosomal protein L2	RP-L2
K02906	0.296018	11.1438	7.8547	0.0121538	0.0939582	Genetic Information Processing	Translation	Ribosome	large subunit ribosomal protein L3	RP-L3
K02926	0.379693	10.6273	10.6734	0.00449517	0.0460467	Genetic Information Processing	Translation	Ribosome	large subunit ribosomal protein L4	RP-L4
K02931	0.739695	10.1811	24.0753	0.000129614	0.00677455	Genetic Information Processing	Translation	Ribosome	large subunit ribosomal protein L5	RP-L5
K02933	0.73825	10.2948	24.2784	0.00012408	0.00677455	Genetic Information Processing	Translation	Ribosome	large subunit ribosomal protein L6	RP-L6
K02874	0.608046	10.0216	17.377	0.000631626	0.0141063	Genetic Information Processing	Translation	Ribosome	large subunit ribosomal protein L14	RP-L14
K02876	0.619147	10.1183	17.886	0.00055381	0.0133579	Genetic Information Processing	Translation	Ribosome	large subunit ribosomal protein L15	RP-L15
K02878	0.645429	10.2304	21.5613	0.000226886	0.00761711	Genetic Information Processing	Translation	Ribosome	large subunit ribosomal protein L16	RP-L16
K02881	0.706114	9.57426	28.2209	5.54543e-05	0.00557316	Genetic Information Processing	Translation	Ribosome	large subunit ribosomal protein L18	RP-L18
K02890	0.603626	9.69861	22.5865	0.000179756	0.00677455	Genetic Information Processing	Translation	Ribosome	large subunit ribosomal protein L22	RP-L22
K02892	0.558525	9.49076	16.8468	0.000725949	0.0156338	Genetic Information Processing	Translation	Ribosome	large subunit ribosomal protein L23	RP-L23
K02895	0.668139	9.49485	19.6937	0.000352831	0.0106378	Genetic Information Processing	Translation	Ribosome	large subunit ribosomal protein L24	RP-L24
K02904	0.729321	8.62686	22.7169	0.000174591	0.00677455	Genetic Information Processing	Translation	Ribosome	large subunit ribosomal protein L29	RP-L29
K02919	0.313757	9.19285	8.02272	0.0114114	0.09054	Genetic Information Processing	Translation	Ribosome	large subunit ribosomal protein L36	RP-L36
K11927	-0.422387	9.2156	13.7667	0.00171339	0.0260845	Genetic Information Processing	Folding, sorting and degradation	RNA degradation	RNA degradosome typeB	rhlE		Figure 6b
K04077	0.707236	12.8813	12.0613	0.00287451	0.036111	Genetic Information Processing	Folding, sorting and degradation	RNA degradation/Protein folding	chaperonin GroEL	groEL
K03072	0.254906	11.0724	15.5133	0.0010414	0.0188175	Genetic Information Processing	Folding, sorting and degradation	Protein export	preprotein translocase	secD		Figure 6b
						Environmental Information Processing	Membrane transport	Bacterial secretion system	preprotein translocase	secD
K03074	0.419569	10.4149	19.0748	0.000410594	0.0112272	Genetic Information Processing	Folding, sorting and degradation	Protein export	preprotein translocase	secF
						Environmental Information Processing	Membrane transport	Bacterial secretion system	preprotein translocase	secE
K03076	0.811526	12.6598	30.7125	3.4587e-05	0.00417119	Genetic Information Processing	Folding, sorting and degradation	Protein export	preprotein translocase	secY
						Environmental Information Processing	Membrane transport	Bacterial secretion system	preprotein translocase	secY
						Cellular Processes	Cellular community - prokaryotes	Quorum sensing	preprotein translocase	secY
K00114	-0.626081	9.70276	10.6701	0.00450003	0.0460467	Metabolism	Carbohydrate metabolism	Glycolysis / Gluconeogenesis	alcohol dehydrogenase (cytochrome c)	exaA		Figure 4a
						Metabolism	Xenobiotics biodegradation and metabolism	Chloroalkane and chloroalkene degradation	alcohol dehydrogenase (cytochrome c)	exaA
K00121	-0.266719	11.928	13.7333	0.00173032	0.0260845	Metabolism	Carbohydrate metabolism	Glycolysis / Gluconeogenesis	alcohol dehydrogenase / S-(hydroxymethyl)glutathione dehydrogenase	adhC
						Metabolism	Energy metabolism	Methane metabolism	alcohol dehydrogenase / S-(hydroxymethyl)glutathione dehydrogenase	adhC
						Metabolism	Amino acid metabolism	Tyrosine metabolism	alcohol dehydrogenase / S-(hydroxymethyl)glutathione dehydrogenase	adhC
						Metabolism	Lipid metabolism	Fatty acid degradation	alcohol dehydrogenase / S-(hydroxymethyl)glutathione dehydrogenase	adhC
						Metabolism	Xenobiotics biodegradation and metabolism	Naphthalene degradation	alcohol dehydrogenase / S-(hydroxymethyl)glutathione dehydrogenase	adhC
						Metabolism	Xenobiotics biodegradation and metabolism	Metabolism of xenobiotics by cytochrome P450	alcohol dehydrogenase / S-(hydroxymethyl)glutathione dehydrogenase	adhC
						Metabolism	Xenobiotics biodegradation and metabolism	Drug metabolism - cytochrome P450	alcohol dehydrogenase / S-(hydroxymethyl)glutathione dehydrogenase	adhC
						Metabolism	Xenobiotics biodegradation and metabolism	Chloroalkane and chloroalkene degradation	alcohol dehydrogenase / S-(hydroxymethyl)glutathione dehydrogenase	adhC
						Metabolism	Metabolism of cofactors and vitamins	Retinol metabolism	alcohol dehydrogenase / S-(hydroxymethyl)glutathione dehydrogenase	adhC
K00161	-0.35909	11.3611	26.7409	7.43628e-05	0.00640582	Metabolism	Carbohydrate_metabolism	Glycolysis_/_Gluconeogenesis	pyruvate dehydrogenase	pdhA
						Metabolism	Carbohydrate_metabolism	Pyruvate_metabolism	pyruvate dehydrogenase	pdhA
						Metabolism	Carbohydrate_metabolism	Citrate_cycle_(TCA_cycle)	pyruvate dehydrogenase	pdhA
						Environmental_Information_Processing	Signal_transduction	HIF-1_signaling_pathway	pyruvate dehydrogenase	pdhA
K00162	-0.275448	11.061	7.94708	0.011739	0.0919302	Metabolism	Carbohydrate_metabolism	Glycolysis_/_Gluconeogenesis	pyruvate dehydrogenase	pdhB
						Metabolism	Carbohydrate_metabolism	Pyruvate_metabolism	pyruvate dehydrogenase	pdhB
						Metabolism	Carbohydrate_metabolism	Citrate_cycle_(TCA_cycle)	pyruvate dehydrogenase	pdhB
						Environmental_Information_Processing	Signal_transduction	HIF-1_signaling_pathway	pyruvate dehydrogenase	pdhB
K00124	-0.309387	9.81496	9.537	0.00661155	0.0604055	Metabolism	Energy_metabolism	Methane_metabolism	formate dehydrogenase	fdsB
						Metabolism	Carbohydrate_metabolism	Glyoxylate_and_dicarboxylate_metabolism	formate dehydrogenase	fdsB
K01785	-0.293016	9.10469	8.92384	0.00820857	0.0687468	Metabolism	Carbohydrate_metabolism	Glycolysis_/_Gluconeogenesis	aldose 1-epimerase	galM
						Metabolism	Carbohydrate_metabolism	Galactose_metabolism	aldose 1-epimerase	galM
K01810	-0.286688	11.0528	19.9807	0.000329176	0.010447	Metabolism	Carbohydrate_metabolism	Glycolysis_/_Gluconeogenesis	glucose-6-phosphate isomerase	pgi
						Metabolism	Carbohydrate_metabolism	Amino_sugar_and_nucleotide_sugar_metabolism	glucose-6-phosphate isomerase	pgi
						Metabolism	Carbohydrate_metabolism	Starch_and_sucrose_metabolism	glucose-6-phosphate isomerase	pgi
						Metabolism	Carbohydrate_metabolism	Pentose_phosphate_pathway	glucose-6-phosphate isomerase	pgi
K15633	-0.24312	9.15788	12.243	0.00271603	0.0348461	Metabolism	Carbohydrate_metabolism	Glycolysis_/_Gluconeogenesis	phosphoglycerate mutase	gpmI
						Metabolism	Energy_metabolism	Methane_metabolism	phosphoglycerate mutase	gpmI
						Metabolism	Amino_acid_metabolism	Glycine,_serine_and_threonine_metabolism	phosphoglycerate mutase	gpmI
K01624	0.270488	10.5582	9.07957	0.00776521	0.0678612	Metabolism	Carbohydrate_metabolism	Glycolysis_/_Gluconeogenesis	fructose-bisphosphate aldolase	fbaA		opposing Figure 4a
						Metabolism	Energy_metabolism	Methane_metabolism	fructose-bisphosphate aldolase	fbaA
						Metabolism	Energy_metabolism	Carbon_fixation_in_photosynthetic_organisms	fructose-bisphosphate aldolase	fbaA
						Metabolism	Carbohydrate_metabolism	Pentose_phosphate_pathway	fructose-bisphosphate aldolase	fbaA
						Metabolism	Carbohydrate_metabolism	Fructose_and_mannose_metabolism	fructose-bisphosphate aldolase	fbaA
K00175	0.188615	12.3967	7.74004	0.0126918	0.0956646	Metabolism	Carbohydrate_metabolism	Glycolysis_/_Gluconeogenesis	2-oxoglutarate/2-oxoacid ferredoxin oxidoreductase	oforB
						Metabolism	Carbohydrate_metabolism	Pyruvate_metabolism	2-oxoglutarate/2-oxoacid ferredoxin oxidoreductase	oforB
						Metabolism	Energy_metabolism	Carbon_fixation_pathways_in_prokaryotes	2-oxoglutarate/2-oxoacid ferredoxin oxidoreductase	oforB
						Metabolism	Carbohydrate_metabolism	Citrate_cycle_(TCA_cycle)	2-oxoglutarate/2-oxoacid ferredoxin oxidoreductase	oforB
						Metabolism	Carbohydrate_metabolism	Butanoate_metabolism	2-oxoglutarate/2-oxoacid ferredoxin oxidoreductase	oforB
K00274	-0.241894	10.9885	12.9172	0.00220798	0.0317002	Metabolism	Amino_acid_metabolism	Glycine,_serine_and_threonine_metabolism	monoamine oxidase	aofH		Figure 4a & Supplementary Figure 5
							Amino_acid_metabolism	Phenylalanine_metabolism	monoamine oxidase	aofH
							Amino_acid_metabolism	Tyrosine_metabolism	monoamine oxidase	aofH
							Amino_acid_metabolism	Tryptophan_metabolism	monoamine oxidase	aofH
							Amino_acid_metabolism	Arginine_and_proline_metabolism	monoamine oxidase	aofH
							Amino_acid_metabolism	Histidine_metabolism	monoamine oxidase	aofH
							Biosynthesis_of_other_secondary_metabolites	Isoquinoline_alkaloid_biosynthesis	monoamine oxidase	aofH
							Xenobiotics_biodegradation_and_metabolism	Drug_metabolism_-_cytochrome_P450	monoamine oxidase	aofH
K01697	-0.439422	9.43178	10.1795	0.0053035	0.0515808	Metabolism	Amino_acid_metabolism	Glycine,_serine_and_threonine_metabolism	cystathionine beta-synthase	CBS		Figure 4a
						Metabolism	Amino_acid_metabolism	Cysteine_and_methionine_metabolism	cystathionine beta-synthase	CBS
K00457	-0.594574	10.804	32.64	2.44222e-05	0.00417119	Metabolism	Amino_acid_metabolism	Phenylalanine_metabolism	4-hydroxyphenylpyruvate dioxygenase	hppD		Supplementary Figure 5
						Metabolism	Amino_acid_metabolism	Tyrosine_metabolism	4-hydroxyphenylpyruvate dioxygenase	hppD
						Metabolism	Metabolism_of_cofactors_and_vitamins	Ubiquinone_and_other_terpenoid-quinone_biosynthesis	4-hydroxyphenylpyruvate dioxygenase	hppD
K00500	-0.851326	9.70922	50.0265	1.76824e-06	0.00106625	Metabolism	Amino_acid_metabolism	Phenylalanine_metabolism	phenylalanine-4-hydroxylase	phhA
						Metabolism	Amino_acid_metabolism	Phenylalanine,_tyrosine_and_tryptophan_biosynthesis	phenylalanine-4-hydroxylase	phhA
						Metabolism	Metabolism_of_cofactors_and_vitamins	Folate_biosynthesis	phenylalanine-4-hydroxylase	phhA
K01714	-0.172769	10.9632	8.18576	0.0107396	0.0863465	Metabolism	Amino_acid_metabolism	Lysine_biosynthesis	4-hydroxy-tetrahydrodipicolinate synthase	dapA
						Metabolism	Biosynthesis_of_other_secondary_metabolites	Monobactam_biosynthesis	4-hydroxy-tetrahydrodipicolinate synthase	dapA
K00681	-0.23014	11.8157	12.5016	0.00250708	0.0328646	Metabolism	Metabolism_of_other_amino_acids	Cyanoamino_acid_metabolism	gamma-glutamyltranspeptidase / glutathione hydrolase	ggt
						Metabolism	Metabolism_of_other_amino_acids	Taurine_and_hypotaurine_metabolism	gamma-glutamyltranspeptidase / glutathione hydrolase	ggt
						Metabolism	Metabolism_of_other_amino_acids	Glutathione_metabolism	gamma-glutamyltranspeptidase / glutathione hydrolase	ggt
K01756	-0.24716	10.1289	10.4232	0.00488575	0.0491018	Metabolism	Nucleotide_metabolism	Purine_metabolism	adenylosuccinate lyase	purB		Figure 4a
						Metabolism	Amino_acid_metabolism	Alanine,_aspartate_and_glutamate_metabolism	adenylosuccinate lyase	purB
K01524	-0.280917	8.97232	11.1623	0.0038291	0.0444028	Metabolism	Nucleotide_metabolism	Purine_metabolism	exopolyphosphatase / guanosine-5'-triphosphate,3'-diphosphate pyrophosphatase	ppx-gppA
K11178	-0.399926	9.1882	14.6531	0.00132579	0.0218983	Metabolism	Nucleotide_metabolism	Purine_metabolism	xanthine dehydrogenase YagS FAD-binding subunit	yagS
K00958	0.450651	10.3222	34.8153	1.67631e-05	0.00417119	Metabolism	Nucleotide_metabolism	Purine_metabolism	sulfate adenylyltransferase	sat		opposing Figure 4a
						Metabolism	Biosynthesis_of_other_secondary_metabolites	Monobactam_biosynthesis	sulfate adenylyltransferase	sat
						Metabolism	Metabolism_of_other_amino_acids	Selenocompound_metabolism	sulfate adenylyltransferase	sat
						Metabolism	Energy_metabolism	Sulfur_metabolism	sulfate adenylyltransferase	sat
K00939	0.561034	10.9275	31.6602	2.90963e-05	0.00417119	Metabolism	Nucleotide_metabolism	Purine_metabolism	adenylate kinase	AK
						Metabolism	Metabolism_of_cofactors_and_vitamins	Thiamine_metabolism	adenylate kinase	AK
K00856	1.24692	8.49586	10.6665	0.0045054	0.0460467	Metabolism	Nucleotide_metabolism	Purine_metabolism	adenosine kinase	ADK
K09903	0.333021	9.60832	10.6739	0.00449432	0.0460467	Metabolism	Nucleotide_metabolism	Pyrimidine_metabolism	uridylate kinase	pyrH
K00507	-0.29609	10.8966	8.92764	0.00819741	0.0687468	Metabolism	Lipid_metabolism	Biosynthesis_of_unsaturated_fatty_acids	stearoyl-CoA desaturase	desC		Supplementary Figure 5
						Environmental_Information_Processing	Signal_transduction	AMPK_signaling_pathway	stearoyl-CoA desaturase	desC
K06281	-0.989199	8.94886	18.4263	0.000482745	0.012129	Metabolism	Xenobiotics_biodegradation_and_metabolism	Nitrotoluene_degradation	hydrogenase large subunit	hyaB
K11533	-1.29705	7.69749	12.7073	0.0023537	0.0322564	Metabolism	Lipid_metabolism	Fatty_acid_biosynthesis	fatty acid synthase	fas		rather supporting Figure 3
K00249	-0.39146	11.3866	9.66579	0.00632258	0.0586541	Metabolism	Amino_acid_metabolism	Valine,_leucine_and_isoleucine_degradation	acyl-CoA dehydrogenase	acd
						Metabolism	Carbohydrate_metabolism	Propanoate_metabolism	acyl-CoA dehydrogenase	acd
						Metabolism	Lipid_metabolism	Fatty_acid_degradation	acyl-CoA dehydrogenase	acd
						Metabolism	Metabolism_of_other_amino_acids	beta-Alanine_metabolism	acyl-CoA dehydrogenase	acd
K00166	-0.322002	8.92151	7.65374	0.0131146	0.0976311	Metabolism	Amino_acid_metabolism	Valine,_leucine_and_isoleucine_degradation	2-oxoisovalerate dehydrogenase	bkdA1
						Metabolism	Carbohydrate_metabolism	Propanoate_metabolism	2-oxoisovalerate dehydrogenase	bkdA2
K00616	-0.259818	9.88532	7.76133	0.0125899	0.0956646	Metabolism	Carbohydrate_metabolism	Pentose_phosphate_pathway	transaldolase	talA
K00606	-0.347844	9.47514	21.5519	0.000227376	0.00761711	Metabolism	Metabolism_of_cofactors_and_vitamins	Pantothenate_and_CoA_biosynthesis	3-methyl-2-oxobutanoate hydroxymethyltransferase	panB
K21147	0.666732	10.0431	9.86478	0.00590366	0.0559552	Genetic_Information_Processing	Folding,_sorting_and_degradation	Sulfur_relay_system	sulfur-carrier protein adenylyltransferase/sulfurtransferase	moeZR
K01890	0.276286	9.80922	8.23979	0.010527	0.0857806	Genetic_Information_Processing	Translation	Aminoacyl-tRNA_biosynthesis	phenylalanyl-tRNA synthetase	pheT
K01637	1.00497	9.1643	14.476	0.0013946	0.0221301	Metabolism	Carbohydrate_metabolism	Glyoxylate_and_dicarboxylate_metabolism	isocitrate lyase	aceA		rather opposing Figure 3
K01755	0.266957	10.0682	8.82663	0.0084998	0.0702107	Metabolism	Amino_acid_metabolism	Alanine,_aspartate_and_glutamate_metabolism	argininosuccinate lyase	argH
						Metabolism	Amino_acid_metabolism	Arginine_biosynthesis	argininosuccinate lyase	argH
K01042	-0.265284	9.34725	10.6836	0.00448002	0.0460467	Metabolism	Metabolism_of_other_amino_acids	Selenocompound_metabolism	L-seryl-tRNA(Ser) seleniumtransferase	selA		pendant (Figure 3)
						Genetic_Information_Processing	Translation	Aminoacyl-tRNA_biosynthesis	L-seryl-tRNA(Ser) seleniumtransferase	selA
K00266	0.381641	10.8054	15.6427	0.00100488	0.0188175	Metabolism	Energy_metabolism	Nitrogen_metabolism	glutamate synthase	gltD
						Metabolism	Amino_acid_metabolism	Alanine,_aspartate_and_glutamate_metabolism	glutamate synthase	gltD
K01601	0.883484	8.41251	9.44955	0.00681626	0.0613463	Metabolism	Energy_metabolism	Carbon_fixation_in_photosynthetic_organisms	ribulose-bisphosphate carboxylase	rbcL
						Metabolism	Carbohydrate_metabolism	Glyoxylate_and_dicarboxylate_metabolism	ribulose-bisphosphate carboxylase	rbcL
K10441	-0.580102	9.5861	14.6061	0.00134368	0.0218983	Environmental Information Processing	Membrane transport	ABC transporters	ribose transport system	rbsA		Environmental Information Processing and Cellular processes were not in focus
K10543	-0.611371	9.14794	12.619	0.00241824	0.0324044	Environmental Information Processing	Membrane transport	ABC transporters	D-xylose transport system	xylF
K01546	2.16475	8.54623	24.1323	0.000128034	0.00677455	Environmental Information Processing	Signal transduction	Two-component system	potassium-transporting ATPase	kdpA
K01547	2.09514	8.59553	25.4514	9.68499e-05	0.00677455	Environmental Information Processing	Signal transduction	Two-component system	potassium-transporting ATPase	kdpB
K01548	1.90041	7.02478	16.296	0.000841025	0.0169046	Environmental Information Processing	Signal transduction	Two-component system	potassium-transporting ATPase	kdpC
K07646	0.583439	9.08512	10.9999	0.00403712	0.0450811	Environmental Information Processing	Signal transduction	Two-component system	sensor histidine kinase	KdpD
K03563	-0.631942	12.3184	11.2579	0.00371223	0.0444028	Environmental Information Processing	Signal transduction	Two-component system	carbon storage regulator	csrA
						Cellular Processes	Cellular community - prokaryotes	Biofilm formation - Pseudomonas aeruginosa	carbon storage regulator	csrA
						Cellular Processes	Cellular community - prokaryotes	Biofilm formation - Escherichia coli	carbon storage regulator	csrA
						Cellular Processes	Cellular community - prokaryotes	Biofilm formation - Vibrio cholerae	carbon storage regulator	csrA
K18139	1.12175	8.44656	15.5665	0.00102622	0.0188175	Cellular Processes	Cellular community - prokaryotes	Quorum sensing	outer membrane protein, multidrug efflux system	e.g. oprM
						Cellular Processes	Cell growth and death	Necroptosis	outer membrane protein, multidrug efflux system	e.g. oprM
						Environmental Information Processing	Signal transduction	PI3K-Akt signaling pathway	outer membrane protein, multidrug efflux system	e.g. oprM
						Genetic Information Processing	Folding, sorting and degradation	Protein processing in endoplasmic reticulum	outer membrane protein, multidrug efflux system	e.g. oprM
K02183	1.81437	7.27194	10.2744	0.00513624	0.0507729	Environmental Information Processing	Signal transduction	Calcium signaling pathway	calmodulin	CALM
						Environmental Information Processing	Signal transduction	Apelin signaling pathway	calmodulin	CALM
						Environmental Information Processing	Signal transduction	Ras signaling pathway	calmodulin	CALM
						Environmental Information Processing	Signal transduction	MAPK signaling pathway - plant	calmodulin	CALM
						Environmental Information Processing	Signal transduction	Rap1 signaling pathway	calmodulin	CALM
						Environmental Information Processing	Signal transduction	Phosphatidylinositol signaling system	calmodulin	CALM
						Environmental Information Processing	Signal transduction	cGMP-PKG signaling pathway	calmodulin	CALM
						Environmental Information Processing	Signal transduction	cAMP signaling pathway	calmodulin	CALM
						Cellular Processes	Cell growth and death	Cellular senescence	calmodulin	CALM
						Cellular Processes	Cell growth and death	Oocyte meiosis	calmodulin	CALM
