# Supplementary material for: Central metabolic responses of microorganisms to years and decades of soil warming
Source: Research Square preprint supplement (doi:10.21203/rs.3.rs-132190/v1), 2021-02-05
Supplement: Supplementary file 2 [file 3b488363d119f7f21c7492f7.xlsx]

## Sheet: Supplementary data S1
KEGG categories			enzyme information					relative transcript abundance [‰ of bacterial transcripts]
KEGG1	KEGG2	KEGG3	KO number	name/description	abbreviation	complex/enzyme	complex (as summarized in Figure 5)	LTW1A	LTW2A	LTW3A	LTW4A	LTW1E	LTW2E	LTW3E	LTW4E	MTW1A	MTW2A	MTW3A	MTW4A	MTW1E	MTW2E	MTW3E	MTW4E
Metabolism	Energy metabolism	Oxidative phosphorylation	K00330	NADH-quinone oxidoreductase subunit A	nuoA	NADH-quinone oxidoreductase_Nuo	NADH_dehydrogenase	0.466555	0.500467	0.389952	0.465911	0.529866	0.537399	0.559111	0.549648	0.555756	0.587471	0.392416	0.460876	0.402015	0.336986	0.284029	0.401734
Metabolism	Energy metabolism	Oxidative phosphorylation	K00331	NADH-quinone oxidoreductase subunit B	nuoB	NADH-quinone oxidoreductase_Nuo	NADH_dehydrogenase	0.824168	0.790531	0.747229	0.776439	0.810742	0.808391	0.912635	0.852871	0.889429	0.926396	0.803986	0.807365	0.745605	0.680436	0.75641	0.780831
Metabolism	Energy metabolism	Oxidative phosphorylation	K00332	NADH-quinone oxidoreductase subunit C	nuoC	NADH-quinone oxidoreductase_Nuo	NADH_dehydrogenase	0.497606	0.494386	0.48528	0.469975	0.468439	0.474236	0.499766	0.404449	0.524774	0.453374	0.384558	0.430949	0.472247	0.420155	0.363572	0.456177
Metabolism	Energy metabolism	Oxidative phosphorylation	K00333	NADH-quinone oxidoreductase subunit D	nuoD	NADH-quinone oxidoreductase_Nuo	NADH_dehydrogenase	1.02599	1.08455	1.05455	0.990868	0.96595	0.952037	1.06312	0.906461	1.17238	1.06344	0.808897	0.96365	1.03259	0.88168	0.789052	1.03213
Metabolism	Energy metabolism	Oxidative phosphorylation	K00334	NADH-quinone oxidoreductase subunit E	nuoE	NADH-quinone oxidoreductase_Nuo	NADH_dehydrogenase	0.282128	0.29949	0.339453	0.279929	0.246177	0.230751	0.274681	0.216195	0.285692	0.308962	0.308923	0.282977	0.304236	0.252955	0.225122	0.292848
Metabolism	Energy metabolism	Oxidative phosphorylation	K00335	NADH-quinone oxidoreductase subunit F	nuoF	NADH-quinone oxidoreductase_Nuo	NADH_dehydrogenase	0.889748	0.869889	0.911419	0.786479	0.780263	0.741662	0.778262	0.649043	0.871059	0.881697	0.7755	0.812353	0.807663	0.74249	0.753783	0.86966
Metabolism	Energy metabolism	Oxidative phosphorylation	K00336	NADH-quinone oxidoreductase subunit G	nuoG	NADH-quinone oxidoreductase_Nuo	NADH_dehydrogenase	0.795259	0.848605	1.02376	0.871821	0.741812	0.679008	0.739688	0.584001	0.795387	0.835034	0.974409	0.849263	0.823102	0.749385	0.699003	0.885993
Metabolism	Energy metabolism	Oxidative phosphorylation	K00337	NADH-quinone oxidoreductase subunit H	nuoH	NADH-quinone oxidoreductase_Nuo	NADH_dehydrogenase	0.691669	0.709958	0.711582	0.735083	0.620365	0.696836	0.720613	0.540945	0.908073	0.95243	0.500465	0.631128	0.597574	0.405504	0.384208	0.584262
Metabolism	Energy metabolism	Oxidative phosphorylation	K00338	NADH-quinone oxidoreductase subunit I	nuoI	NADH-quinone oxidoreductase_Nuo	NADH_dehydrogenase	0.353329	0.362732	0.331892	0.330608	0.344178	0.362172	0.396761	0.388876	0.418119	0.397378	0.346249	0.359124	0.285467	0.242182	0.263768	0.336689
Metabolism	Energy metabolism	Oxidative phosphorylation	K00339	NADH-quinone oxidoreductase subunit J	nuoJ	NADH-quinone oxidoreductase_Nuo	NADH_dehydrogenase	0.225649	0.248105	0.258978	0.261044	0.215229	0.254182	0.215336	0.167643	0.313658	0.311418	0.215608	0.197851	0.205246	0.145654	0.158336	0.192557
Metabolism	Energy metabolism	Oxidative phosphorylation	K00340	NADH-quinone oxidoreductase subunit K	nuoK	NADH-quinone oxidoreductase_Nuo	NADH_dehydrogenase	0.160872	0.167836	0.175533	0.192915	0.151926	0.175228	0.169132	0.129625	0.249227	0.254931	0.13015	0.162271	0.136831	0.110318	0.0847959	0.125793
Metabolism	Energy metabolism	Oxidative phosphorylation	K00341	NADH-quinone oxidoreductase subunit L	nuoL	NADH-quinone oxidoreductase_Nuo	NADH_dehydrogenase	0.737709	0.848301	0.884414	0.876602	0.729152	0.785469	0.883387	0.604613	1.03694	1.15431	0.65861	0.679676	0.66387	0.480485	0.411973	0.622373
Metabolism	Energy metabolism	Oxidative phosphorylation	K00342	NADH-quinone oxidoreductase subunit M	nuoM	NADH-quinone oxidoreductase_Nuo	NADH_dehydrogenase	0.587544	0.687762	0.687818	0.688229	0.556594	0.628579	0.707896	0.498806	0.981827	1.032	0.440056	0.576262	0.522499	0.352931	0.312544	0.487697
Metabolism	Energy metabolism	Oxidative phosphorylation	K00343	NADH-quinone oxidoreductase subunit N	nuoN	NADH-quinone oxidoreductase_Nuo	NADH_dehydrogenase	0.507777	0.519318	0.604102	0.568464	0.440305	0.483914	0.521809	0.367348	0.680507	0.719111	0.400765	0.502109	0.421995	0.327937	0.284404	0.397149
Metabolism	Energy metabolism	Oxidative phosphorylation	K13378	NADH-quinone oxidoreductase subunit C/D	nuoCD	NADH-quinone oxidoreductase_Nuo	NADH_dehydrogenase	0.0286411	0.0349658	0.0261949	0.0255785	0.0290723	0.0188472	0.0483235	0.0311467	0.0789629	0.0520668	0.00933154	0.0345823	0.0245205	0.0219774	0.0210114	0.0286544
Metabolism	Energy metabolism	Oxidative phosphorylation	K03885	NADH dehydrogenase	ndh	NADH dehydrogenase	NADH_dehydrogenase	0.959075	0.791748	1.2876	0.925846	0.82856	0.747265	0.788012	0.837755	0.481454	0.489723	1.12421	0.806035	1.03138	1.04974	0.835202	0.834128
Metabolism	Energy metabolism	Oxidative phosphorylation	K05576	NAD(P)H-quinone oxidoreductase subunit 4L	ndhE	NAD(P)H-quinone oxidoreductase_ndh_hox	NADH_dehydrogenase	0.0149897	0.00760126	0.00675125	0.0102792	0.00750253	0.00865952	0.0084778	0.00549648	0.0194665	0.0117887	0.00491134	0.00964315	0.00938439	0.0103423	0.00525284	0.00515779
Metabolism	Energy metabolism	Oxidative phosphorylation	K05580	NAD(P)H-quinone oxidoreductase subunit I	ndhI	NAD(P)H-quinone oxidoreductase_ndh_hox	NADH_dehydrogenase	0.00669184	0.0100337	0.00783145	0.0105183	0.00797143	0.0091689	0.0118689	0.011451	0.00904783	0.00638555	0.00196454	0.00764802	0.00787078	0.00775671	0.00525284	0.00716359
Metabolism	Energy metabolism	Oxidative phosphorylation	K05586	bidirectional NiFe hydrogenase diaphorase subunit	hoxE	NAD(P)H-quinone oxidoreductase_ndh_hox	NADH_dehydrogenase	0.00588882	0.0100337	0.00675125	0.00764965	0.00515799	0.0152815	0.0105973	0.011451	0.0082253	0.00540316	0.00736701	0.00631793	0.00998984	0.006033	0.00412723	0.00802322
Metabolism	Energy metabolism	Oxidative phosphorylation	K05587	bidirectional NiFe hydrogenase diaphorase subunit	hoxF	NAD(P)H-quinone oxidoreductase_ndh_hox	NADH_dehydrogenase	0.0173988	0.0267564	0.0178233	0.0155383	0.0206319	0.0264879	0.0224662	0.0283985	0.016999	0.0191567	0.0166985	0.0172912	0.0172552	0.0137897	0.0187602	0.0252158
Metabolism	Energy metabolism	Oxidative phosphorylation	K05588	bidirectional NiFe hydrogenase diaphorase subunit	hoxU	NAD(P)H-quinone oxidoreductase_ndh_hox	NADH_dehydrogenase	0.00856556	0.0158106	0.00837155	0.0083668	0.0178185	0.017319	0.00932558	0.0128251	0.00630606	0.0117887	0.0117872	0.00665045	0.00877895	0.00775671	0.00525284	0.00974248
Metabolism	Energy metabolism	Oxidative phosphorylation	K00239	succinate dehydrogenase / fumarate reductase, flavoprotein subunit	sdhA, frdA	succinate_dehydrogenase_P	succinate dehydrogenase	1.10362	1.07117	1.10667	1.03055	0.984238	0.917909	0.995294	0.851955	0.973601	0.948991	0.855555	0.976951	1.0114	0.949336	0.911744	1.08428
Metabolism	Energy metabolism	Oxidative phosphorylation	K00240	succinate dehydrogenase / fumarate reductase, iron-sulfur subunit	sdhB, frdB	succinate_dehydrogenase_P	succinate dehydrogenase	0.511525	0.502596	0.532809	0.472127	0.446869	0.439598	0.47942	0.445215	0.508598	0.42292	0.414026	0.429287	0.478604	0.402056	0.417976	0.508615
Metabolism	Energy metabolism	Oxidative phosphorylation	K00241	succinate dehydrogenase / fumarate reductase, cytochrome b subunit	sdhC, frdC	succinate_dehydrogenase_P	succinate dehydrogenase	0.302471	0.255098	0.286793	0.253873	0.27056	0.244504	0.280191	0.299558	0.24813	0.27114	0.246058	0.241411	0.281835	0.265021	0.22137	0.276228
Metabolism	Energy metabolism	Oxidative phosphorylation	K00242	succinate dehydrogenase / fumarate reductase, membrane anchor subunit	sdhD, frdD	succinate_dehydrogenase_P	succinate dehydrogenase	0.0958272	0.0751005	0.0912769	0.0865366	0.0942505	0.078445	0.0686702	0.0897759	0.0699151	0.0820298	0.0496045	0.0728224	0.0823405	0.054297	0.0529036	0.0578818
Metabolism	Energy metabolism	Oxidative phosphorylation	K00244	fumarate reductase flavoprotein subunit	frdA	fumarate_reductase_P	succinate dehydrogenase	0.109479	0.0790531	0.069943	0.0671735	0.107849	0.130402	0.088593	0.0810731	0.161216	0.13557	0.0594272	0.0665045	0.0717452	0.0883404	0.0832951	0.0971383
Metabolism	Energy metabolism	Oxidative phosphorylation	K00245	fumarate reductase iron-sulfur subunit	frdB	fumarate_reductase_P	succinate dehydrogenase	0.0406864	0.0322294	0.0291654	0.0286862	0.0384504	0.0463539	0.0445085	0.0320628	0.0627865	0.0397869	0.022101	0.0315896	0.0293641	0.0349052	0.0300163	0.029514
Metabolism	Energy metabolism	Oxidative phosphorylation	K00246	fumarate reductase subunit C	frdC	fumarate_reductase_P	succinate dehydrogenase	0.0147221	0.00760126	0.0059411	0.00764965	0.0131294	0.0183378	0.01526	0.011451	0.026321	0.025051	0.00834927	0.00798054	0.00665989	0.00861857	0.00862967	0.00974248
Metabolism	Energy metabolism	Oxidative phosphorylation	K00247	fumarate reductase subunit D	frdD	fumarate_reductase_P	succinate dehydrogenase	0.0133837	0.00790531	0.00513095	0.00717155	0.0112538	0.0142627	0.0084778	0.00641256	0.0211116	0.0167007	0.014734	0.00764802	0.00363267	0.006033	0.00787927	0.00945594
Metabolism	Energy metabolism	Oxidative phosphorylation	K00410	ubiquinol-cytochrome c reductase cytochrome b/c1 subunit (note:Cytb and Cyt1)	fbcH	cytochrome_c_reductase	cytochrome bc complex	0.117776	0.133478	0.136375	0.17379	0.0956572	0.0942359	0.128863	0.102601	0.0638832	0.0790826	0.099209	0.136334	0.076286	0.0478331	0.0484012	0.117769
Metabolism	Energy metabolism	Oxidative phosphorylation	K00411	ubiquinol-cytochrome c reductase iron-sulfur subunit (note:ISP)	UQCRFS1, RIP1, petA	cytochrome_c_reductase	cytochrome bc complex	0.141064	0.163275	0.190925	0.203672	0.197879	0.158928	0.181849	0.160314	0.216051	0.216618	0.139482	0.156286	0.149545	0.11592	0.121191	0.129518
Metabolism	Energy metabolism	Oxidative phosphorylation	K00412	ubiquinol-cytochrome c reductase cytochrome b subunit (note:Cytb)	CYTB, petB	cytochrome_c_reductase	cytochrome bc complex	0.273027	0.282159	0.338913	0.307181	0.339489	0.333137	0.388283	0.283527	0.422506	0.426358	0.159127	0.22678	0.223106	0.190901	0.14783	0.232673
Metabolism	Energy metabolism	Oxidative phosphorylation	K00413	ubiquinol-cytochrome c reductase cytochrome c1 subunit	CYC1, CYT1, petC	cytochrome_c_reductase	cytochrome bc complex	0.0768224	0.0644587	0.144207	0.0956206	0.106442	0.0672386	0.0907125	0.0595452	0.146685	0.147359	0.0510779	0.0681671	0.0662962	0.0659321	0.049902	0.0856765
Metabolism	Energy metabolism	Oxidative phosphorylation	K03886	menaquinol-cytochrome c reductase iron-sulfur subunit (note:ISP)	MQCRA, qcrA, bfcA, petC	cytochrome_c_reductase	cytochrome bc complex	0.0256967	0.0310132	0.032406	0.0341844	0.0436084	0.0382038	0.0402696	0.0393914	0.0359171	0.029963	0.0142429	0.0236091	0.0214933	0.0193918	0.018385	0.0286544
Metabolism	Energy metabolism	Oxidative phosphorylation	K03888	menaquinol-cytochrome c reductase cytochrome b/c subunit	MQCRC, qcrC, bfcC, petD	cytochrome_c_reductase	cytochrome bc complex	0.0299795	0.0325334	0.0194436	0.00980111	0.0164118	0.0244504	0.0190751	0.02336	0.0120638	0.0211214	0.0446932	0.0219465	0.0538846	0.0581754	0.0581565	0.065905
Metabolism	Energy metabolism	Oxidative phosphorylation	K03889	ubiquinol-cytochrome c reductase cytochrome c subunit	qcrC	cytochrome_c_reductase	cytochrome bc complex	0.089403	0.0644587	0.0521197	0.0643049	0.0468908	0.0519571	0.0364545	0.0618354	0.0293369	0.0442077	0.117872	0.0605191	0.0514628	0.0555898	0.0817943	0.0879689
Metabolism	Energy metabolism	Oxidative phosphorylation	K03890	ubiquinol-cytochrome c reductase iron-sulfur subunit (note:ISP)	qcrA	cytochrome_c_reductase	cytochrome bc complex	0.0971656	0.0711478	0.0526598	0.0707592	0.0384504	0.0713137	0.0288245	0.0549648	0.0342721	0.0633643	0.149305	0.0754826	0.0532791	0.0655011	0.0885479	0.10201
Metabolism	Energy metabolism	Oxidative phosphorylation	K03891	ubiquinol-cytochrome c reductase cytochrome b subunit (note:Cytb)	qcrB	cytochrome_c_reductase	cytochrome bc complex	0.190316	0.131046	0.1091	0.134825	0.0961261	0.125818	0.0546818	0.110388	0.082253	0.159148	0.279455	0.132344	0.0992929	0.141776	0.124943	0.185967
Metabolism	Energy metabolism	Oxidative phosphorylation	K00404	cytochrome c oxidase cbb3-type subunit I	ccoN	cytochrome_c_oxidase_cbb3_type	cytochrome c oxidase	0.0730749	0.0979043	0.0726435	0.0693249	0.0670538	0.0565416	0.0750285	0.0613774	0.127492	0.132623	0.0422375	0.0518735	0.0590309	0.0448166	0.0397715	0.0535837
Metabolism	Energy metabolism	Oxidative phosphorylation	K00405	cytochrome c oxidase cbb3-type subunit II	ccoO	cytochrome_c_oxidase_cbb3_type	cytochrome c oxidase	0.0337269	0.041959	0.0337563	0.0308376	0.020163	0.0249598	0.0296723	0.0242761	0.0501743	0.0451901	0.018172	0.0156286	0.0211906	0.0189609	0.0172593	0.0237831
Metabolism	Energy metabolism	Oxidative phosphorylation	K00406	cytochrome c oxidase cbb3-type subunit III	ccoP	cytochrome_c_oxidase_cbb3_type	cytochrome c oxidase	0.0390804	0.0605061	0.05374	0.0447026	0.0586135	0.0631635	0.0610402	0.0654997	0.0740277	0.0633643	0.0206276	0.0495459	0.0402621	0.0310269	0.0393963	0.0369641
Metabolism	Energy metabolism	Oxidative phosphorylation	K15862	cytochrome c oxidase cbb3-type subunit I/II	ccoNO	cytochrome_c_oxidase_cbb3_type	cytochrome c oxidase	0.0248937	0.00547291	0.0145827	0.00621534	0.00844034	0.00967828	0.00890169	0.0091608	0.016999	0.022595	0.00245567	0.00465532	0.00938439	0.0112041	0.0116313	0.013181
Metabolism	Energy metabolism	Oxidative phosphorylation	K02258	cytochrome c oxidase assembly protein subunit 11	COX11, ctaG	cytochrome_c_oxidase_EP_Cox	cytochrome c oxidase	0.0701305	0.084222	0.1091	0.107573	0.0759631	0.0601072	0.0784197	0.0467201	0.112961	0.113958	0.0712144	0.0897811	0.0672044	0.0551589	0.0438988	0.0745013
Metabolism	Energy metabolism	Oxidative phosphorylation	K02259	cytochrome c oxidase assembly protein subunit 15	COX15, ctaA	cytochrome_c_oxidase_EP_Cox	cytochrome c oxidase	0.24626	0.246281	0.223872	0.25196	0.22742	0.229223	0.2484	0.200164	0.242921	0.260334	0.240164	0.235758	0.227042	0.203398	0.179722	0.229808
Metabolism	Energy metabolism	Oxidative phosphorylation	K02274	cytochrome c oxidase subunit I	coxA, ctaD	cytochrome_c_oxidase_P_Cox	cytochrome c oxidase	1.89674	1.81731	1.58006	1.79528	1.71902	1.76399	1.69556	1.46527	2.17833	2.37935	1.28628	1.57516	1.368	1.08034	1.05995	1.48917
Metabolism	Energy metabolism	Oxidative phosphorylation	K02275	cytochrome c oxidase subunit II	coxB, ctaC	cytochrome_c_oxidase_P_Cox	cytochrome c oxidase	0.898581	0.931307	0.872802	0.915328	0.865135	0.885818	0.908397	0.828136	1.10548	1.31346	0.657628	0.838622	0.714122	0.713187	0.58194	0.759341
Metabolism	Energy metabolism	Oxidative phosphorylation	K02276	cytochrome c oxidase subunit III	coxC, ctaE	cytochrome_c_oxidase_P_Cox	cytochrome c oxidase	0.56613	0.614486	0.564405	0.591652	0.578163	0.591394	0.598957	0.494683	0.738084	0.826683	0.476891	0.567948	0.427444	0.390421	0.334306	0.476809
Metabolism	Energy metabolism	Oxidative phosphorylation	K02277	cytochrome c oxidase subunit IV	coxD, ctaF	cytochrome_c_oxidase_P_Cox	cytochrome c oxidase	0.0556761	0.0687154	0.0515796	0.0652611	0.0529866	0.0555228	0.0703658	0.0590872	0.109122	0.108063	0.0314326	0.0608516	0.0351158	0.0336124	0.0247634	0.0392565
Metabolism	Energy metabolism	Oxidative phosphorylation	K15408	cytochrome c oxidase subunit I+III	coxAC	cytochrome_c_oxidase_P_Cox	cytochrome c oxidase	0.0173988	0.0212835	0.0121523	0.0124307	0.0145361	0.0219035	0.0144123	0.0123671	0.0109671	0.0142447	0.0201365	0.0149635	0.0199797	0.0137897	0.0112561	0.0191984
Metabolism	Energy metabolism	Oxidative phosphorylation	K02297	cytochrome o ubiquinol oxidase subunit II	cyoA	cytochrome_c_oxidase_P_Cyo	cytochrome c oxidase	0.0489843	0.0334456	0.0721034	0.0351406	0.0417328	0.0331099	0.0364545	0.0444299	0.0101445	0.0176831	0.0235744	0.0325872	0.0332995	0.0288722	0.0206362	0.0289409
Metabolism	Energy metabolism	Oxidative phosphorylation	K02298	cytochrome o ubiquinol oxidase subunit I	cyoB	cytochrome_c_oxidase_P_Cyo	cytochrome c oxidase	0.0928828	0.0827017	0.192006	0.0798432	0.109256	0.0728418	0.0724852	0.0769507	0.0389331	0.0545228	0.0643385	0.074485	0.0584254	0.0633465	0.0360195	0.0739283
Metabolism	Energy metabolism	Oxidative phosphorylation	K02299	cytochrome o ubiquinol oxidase subunit III	cyoC	cytochrome_c_oxidase_P_Cyo	cytochrome c oxidase	0.0896707	0.0608101	0.0955978	0.0633486	0.0853412	0.0774263	0.0690941	0.056797	0.0792371	0.0702411	0.0378173	0.0681671	0.0626635	0.0667939	0.0529036	0.0670512
Metabolism	Energy metabolism	Oxidative phosphorylation	K02300	cytochrome o ubiquinol oxidase subunit IV	cyoD	cytochrome_c_oxidase_P_Cyo	cytochrome c oxidase	0.0190048	0.0188511	0.0448283	0.0205584	0.0332925	0.013244	0.0173795	0.0183216	0.00712859	0.0103151	0.0171897	0.0176237	0.0121089	0.0198227	0.00938008	0.0137541
Metabolism	Energy metabolism	Oxidative phosphorylation	K02257	heme o synthase	COX10, ctaB, cyoE	cytochrome_c_oxidase_P_Cyo	cytochrome c oxidase	0.555423	0.563102	0.517146	0.580178	0.441242	0.477292	0.503581	0.398037	0.503663	0.553087	0.532389	0.560633	0.485264	0.421017	0.435611	0.486265
Metabolism	Energy metabolism	Oxidative phosphorylation	K01535	H+transporting ATPase	PMA1, PMA2	H+transporting ATPase	ATP synthase	0.00883323	0.00972962	0.00513095	0.00717155	0.010316	0.0122252	0.0165317	0.0146573	0.00630606	0.00491196	0.0122783	0.00931063	0.00696261	0.00258557	0.00300163	0.00802322
Metabolism	Energy metabolism	Oxidative phosphorylation	K02108	F-type H+transporting ATPase subunit a	ATPF0A, atpB	F-type ATPase_B	ATP synthase	0.735835	0.781106	0.682417	0.870387	0.743219	0.746247	0.826586	0.664158	0.98923	1.13859	0.684149	0.682336	0.823102	0.679574	0.47163	0.594865
Metabolism	Energy metabolism	Oxidative phosphorylation	K02109	F-type H+transporting ATPase subunit b	ATPF0B, atpF	F-type ATPase_B	ATP synthase	0.414091	0.508981	0.490681	0.571333	0.436553	0.394263	0.450595	0.310551	0.578787	0.691113	0.627669	0.44691	0.517352	0.51496	0.405219	0.478528
Metabolism	Energy metabolism	Oxidative phosphorylation	K02110	F-type H+transporting ATPase subunit c	ATPF0C, atpE	F-type ATPase_B	ATP synthase	0.520893	0.650364	0.530649	0.718589	0.75119	0.598525	0.843965	0.540029	0.919589	1.34981	0.473944	0.542677	0.597574	0.596405	0.382332	0.425231
Metabolism	Energy metabolism	Oxidative phosphorylation	K02111	F-type H+transporting ATPase subunit alpha	ATPF1A, atpA	F-type ATPase_B	ATP synthase	1.47676	1.8088	1.8223	1.91409	1.53098	1.33764	1.75363	1.35168	1.82574	1.96233	1.72437	1.58247	1.99857	1.78232	1.41226	1.83187
Metabolism	Energy metabolism	Oxidative phosphorylation	K02112	F-type H+transporting ATPase subunit beta	ATPF1B, atpD	F-type ATPase_B	ATP synthase	1.17188	1.43177	1.58816	1.61694	1.12679	1.04118	1.27718	0.86707	1.64369	1.68922	1.36486	1.33973	1.40766	1.30701	1.09259	1.36624
Metabolism	Energy metabolism	Oxidative phosphorylation	K02113	F-type H+transporting ATPase subunit delta	ATPF1D, atpH	F-type ATPase_B	ATP synthase	0.464146	0.563406	0.556303	0.633486	0.475004	0.390697	0.463312	0.325667	0.452117	0.504459	0.826578	0.513747	0.634203	0.706292	0.467128	0.53555
Metabolism	Energy metabolism	Oxidative phosphorylation	K02114	F-type H+transporting ATPase subunit epsilon	ATPF1E, atpC	F-type ATPase_B	ATP synthase	0.348779	0.365773	0.456115	0.465672	0.316982	0.292386	0.328091	0.247342	0.490228	0.547684	0.466577	0.389051	0.412913	0.496861	0.351565	0.397723
Metabolism	Energy metabolism	Oxidative phosphorylation	K02115	F-type H+transporting ATPase subunit gamma	ATPF1G, atpG	F-type ATPase_B	ATP synthase	0.653927	0.775937	0.862	0.853892	0.66116	0.52874	0.739688	0.458956	0.896009	0.904784	0.852608	0.796724	0.867602	0.788599	0.631092	0.837854
Metabolism	Energy metabolism	Oxidative phosphorylation	K02117	V/A-type H+transporting ATPase subunit A	ATPVA, ntpA, atpA	V/A-type ATPase_P	ATP synthase	0.00267674	0.00212835	0.00459085	0.00430293	0.00937816	0.0157909	0.0207706	0.00778668	0.0350946	0.027507	0.0044202	0.00332523	0.00363267	0.00172371	0.00487764	0.00515779
Metabolism	Energy metabolism	Oxidative phosphorylation	K02118	V/A-type H+transporting ATPase subunit B	ATPVB, ntpB, atpB	V/A-type ATPase_P	ATP synthase	0.00214139	0.0012162	0.0032406	0.00286862	0.00797143	0.0137534	0.0127167	0.0045804	0.0249501	0.0216126	0.00343794	0.00166261	0.0027245	0.00172371	0.00300163	0.00401161
Metabolism	Energy metabolism	Oxidative phosphorylation	K02123	V/A-type H+transporting ATPase subunit I	ATPVI, ntpI, atpI	V/A-type ATPase_P	ATP synthase	0.0010707	0.000608101	0.0016203	0.00167336	0.00703362	0.0122252	0.00932558	0.00183216	0.02166	0.0127711	0.00196454	0.00133009	0.00242178	0.00215464	0.00150081	0.00401161
Metabolism	Energy metabolism	Oxidative phosphorylation	K00937	polyphosphate kinase	ppk	polyphosphate_kinase	poly-P kinase + diphosphatase	0.737441	0.691715	0.615174	0.572528	0.74275	0.811957	0.729091	0.75943	0.689006	0.617434	0.684149	0.709603	0.862456	0.659752	0.852837	0.877683
Metabolism	Energy metabolism	Oxidative phosphorylation	K22468	polyphosphate kinase	ppk2	polyphosphate_kinase	poly-P kinase + diphosphatase	0.157392	0.28672	0.16284	0.189807	0.330111	0.395281	0.33021	0.337118	0.302965	0.296683	0.301556	0.238086	0.21796	0.150825	0.190978	0.228375
Metabolism	Energy metabolism	Oxidative phosphorylation	K01507	inorganic pyrophosphatase	ppa	inorganic_diphosphatase	poly-P kinase + diphosphatase	0.213068	0.326246	0.210369	0.216581	0.150988	0.139062	0.156839	0.190545	0.178215	0.166516	0.476891	0.196188	0.193137	0.156858	0.163589	0.208604
Metabolism	Energy metabolism	Oxidative phosphorylation	K06019	pyrophosphatase PpaX	ppaX	inorganic_diphosphatase	poly-P kinase + diphosphatase	0.0109746	0.0124661	0.0116122	0.0121916	0.0060958	0.0112064	0.00974947	0.00412236	0.00877365	0.00835034	0.00834927	0.0106407	0.014228	0.00818764	0.00675366	0.00888285
Metabolism	Energy metabolism	Oxidative phosphorylation	K15986	manganese-dependent inorganic pyrophosphatase	ppaC	inorganic_diphosphatase	poly-P kinase + diphosphatase	0.0120453	0.0170268	0.0151228	0.0133869	0.0187563	0.0254692	0.0165317	0.0187796	0.0323529	0.0265246	0.0127695	0.0156286	0.0284559	0.0349052	0.0210114	0.0183388
Genetic information processing	Transcription	RNA polymerase	K03040	DNA-directed RNA polymerase subunit alpha	rpoA	RNA_polymerase_B	RNA polymerase	2.02147	2.3795	2.57655	2.92934	2.13588	2.00748	2.55139	1.95904	2.71901	2.93834	2.91783	2.89029	2.48142	2.23997	2.16455	2.38891
Genetic information processing	Transcription	RNA polymerase	K03043	DNA-directed RNA polymerase subunit beta	rpoB	RNA_polymerase_B	RNA polymerase	8.12711	8.44987	8.81903	10.529	6.85731	6.41008	7.81145	6.36951	8.85234	9.18242	13.9055	11.3533	9.62687	8.08939	10.6708	9.39462
Genetic information processing	Transcription	RNA polymerase	K03046	DNA-directed RNA polymerase subunit beta'	rpoC	RNA_polymerase_B	RNA polymerase	6.41079	7.26346	8.60515	10.4406	5.51858	4.73879	5.78525	5.05356	9.09225	10.2061	13.0823	11.4936	6.82942	6.96596	7.69729	7.35557
Genetic information processing	Transcription	RNA polymerase	K03060	DNA-directed RNA polymerase subunit omega	rpoZ	RNA_polymerase_B	RNA polymerase	0.551408	0.534217	0.554413	0.599541	0.599264	0.626032	0.686702	0.769965	0.518742	0.630205	0.845732	0.647089	0.671741	0.646824	0.670113	0.650454
Genetic information processing	Translation	Ribosome	K02863	large subunit ribosomal protein L1	RP-L1, MRPL1, rplA	RP_large_subunit_P	ribosomal proteins	1.38414	1.73765	1.74263	2.01449	1.52583	1.46193	1.72142	1.34939	2.08813	2.28652	2.14183	1.92664	1.79605	1.8698	1.69029	1.66596
Genetic information processing	Translation	Ribosome	K02864	large subunit ribosomal protein L10	RP-L10, MRPL10, rplJ	RP_large_subunit_P	ribosomal proteins	1.0011	1.10066	1.31757	1.61694	1.23323	1.04627	1.28269	1.00494	1.53676	1.97215	1.37321	1.59977	1.23632	1.64572	1.17251	1.18572
Genetic information processing	Translation	Ribosome	K02867	large subunit ribosomal protein L11	RP-L11, MRPL11, rplK	RP_large_subunit_P	ribosomal proteins	0.891889	0.990597	0.994865	1.02505	0.913901	0.834879	1.12924	0.866154	1.36403	1.37388	0.894355	1.10198	0.943283	0.827814	0.859215	0.959062
Genetic information processing	Translation	Ribosome	K02871	large subunit ribosomal protein L13	RP-L13, MRPL13, rplM	RP_large_subunit_P	ribosomal proteins	1.10255	1.04533	1.02997	1.16896	1.21025	1.25003	1.47683	1.29259	1.62203	1.59246	1.29021	1.25128	1.16336	1.24064	1.10948	1.12955
Genetic information processing	Translation	Ribosome	K02874	large subunit ribosomal protein L14	RP-L14, MRPL14, rplN	RP_large_subunit_P	ribosomal proteins	0.653392	0.733066	1.02106	0.999235	0.714147	0.629088	0.763002	0.507966	1.34018	1.43626	0.864396	0.988257	0.7117	0.599853	0.620961	0.760487
Genetic information processing	Translation	Ribosome	K02876	large subunit ribosomal protein L15	RP-L15, MRPL15, rplO	RP_large_subunit_P	ribosomal proteins	0.744133	0.771984	1.0937	1.16562	0.650844	0.63571	0.68543	0.55148	1.341	1.60081	1.08639	1.14621	0.787078	0.871338	0.769917	0.894876
Genetic information processing	Translation	Ribosome	K02878	large subunit ribosomal protein L16	RP-L16, MRPL16, rplP	RP_large_subunit_P	ribosomal proteins	0.827647	0.961408	1.30137	1.29375	0.736654	0.611769	0.891017	0.54461	1.51592	1.48145	1.04415	1.27323	0.90847	0.758003	0.766915	1.02669
Genetic information processing	Translation	Ribosome	K02879	large subunit ribosomal protein L17	RP-L17, MRPL17, rplQ	RP_large_subunit_P	ribosomal proteins	0.943282	0.981779	1.08155	1.3253	0.99174	0.808391	1.05294	0.787371	1.29658	1.47113	1.32655	1.31147	1.14611	1.26478	1.13874	1.06021
Genetic information processing	Translation	Ribosome	K02881	large subunit ribosomal protein L18	RP-L18, MRPL18, rplR	RP_large_subunit_P	ribosomal proteins	0.54659	0.607493	0.801509	0.771419	0.451558	0.428391	0.499343	0.398495	0.975795	1.07818	0.652226	0.831639	0.516142	0.452906	0.499771	0.632688
Genetic information processing	Translation	Ribosome	K02884	large subunit ribosomal protein L19	RP-L19, MRPL19, rplS	RP_large_subunit_P	ribosomal proteins	0.900187	0.891476	0.86227	1.0033	0.993147	1.00756	1.09618	1.06769	1.2752	1.44068	1.15858	1.00488	1.0786	1.12989	1.07158	1.02554
Genetic information processing	Translation	Ribosome	K02886	large subunit ribosomal protein L2	RP-L2, MRPL2, rplB	RP_large_subunit_P	ribosomal proteins	1.55545	1.71789	2.19929	2.39434	1.55302	1.24493	1.7744	1.08556	2.52763	2.49822	2.10205	2.25284	1.90564	1.62546	1.50344	1.84018
Genetic information processing	Translation	Ribosome	K02887	large subunit ribosomal protein L20	RP-L20, MRPL20, rplT	RP_large_subunit_P	ribosomal proteins	0.880914	0.937996	0.892786	1.27725	1.24589	1.13898	1.27421	1.26007	1.324	1.70887	1.00191	1.10065	1.17698	1.57763	1.06595	0.983418
Genetic information processing	Translation	Ribosome	K02888	large subunit ribosomal protein L21	RP-L21, MRPL21, rplU	RP_large_subunit_P	ribosomal proteins	0.971656	0.94955	0.942745	1.18378	1.11319	1.07887	1.32211	1.26007	1.41667	1.54432	1.09965	1.08801	0.985361	1.15618	0.963146	1.06594
Genetic information processing	Translation	Ribosome	K02890	large subunit ribosomal protein L22	RP-L22, MRPL22, rplV	RP_large_subunit_P	ribosomal proteins	0.582993	0.669519	0.833105	0.920587	0.51955	0.448257	0.645585	0.418191	1.00924	1.01334	0.821667	0.84361	0.656605	0.524871	0.54517	0.678822
Genetic information processing	Translation	Ribosome	K02892	large subunit ribosomal protein L23	RP-L23, MRPL23, rplW	RP_large_subunit_P	ribosomal proteins	0.508045	0.571615	0.679176	0.726238	0.455778	0.365228	0.581577	0.353149	0.883123	0.834542	0.825105	0.716254	0.58153	0.520562	0.472756	0.609478
Genetic information processing	Translation	Ribosome	K02895	large subunit ribosomal protein L24	RP-L24, MRPL24, rplX	RP_large_subunit_P	ribosomal proteins	0.499212	0.559453	0.75641	0.757076	0.454372	0.402413	0.568861	0.352233	0.991971	1.02857	0.596728	0.737202	0.505546	0.423172	0.450619	0.589993
Genetic information processing	Translation	Ribosome	K02897	large subunit ribosomal protein L25	RP-L25, rplY	RP_large_subunit_P	ribosomal proteins	0.765012	0.767119	0.781255	0.881383	0.869824	0.846595	0.935102	0.798822	1.01007	1.15971	0.946415	0.912774	0.930871	1.01872	0.894109	0.91694
Genetic information processing	Translation	Ribosome	K02899	large subunit ribosomal protein L27	RP-L27, MRPL27, rpmA	RP_large_subunit_P	ribosomal proteins	1.0359	1.02191	1.00864	1.42044	1.44471	1.38501	1.56924	1.5697	1.70181	2.06892	1.31526	1.34771	1.23057	1.71984	1.32859	1.19317
Genetic information processing	Translation	Ribosome	K02902	large subunit ribosomal protein L28	RP-L28, MRPL28, rpmB	RP_large_subunit_P	ribosomal proteins	0.725396	0.755566	0.64569	0.955489	0.889518	0.847105	1.08219	1.0283	1.01007	1.23438	0.926278	0.957997	0.914827	1.0506	0.671989	0.70633
Genetic information processing	Translation	Ribosome	K02904	large subunit ribosomal protein L29	RP-L29, rpmC	RP_large_subunit_P	ribosomal proteins	0.300598	0.334456	0.43235	0.402085	0.232578	0.185925	0.28443	0.196499	0.495711	0.514774	0.38996	0.418978	0.294246	0.218912	0.256264	0.334683
Genetic information processing	Translation	Ribosome	K02906	large subunit ribosomal protein L3	RP-L3, MRPL3, rplC	RP_large_subunit_P	ribosomal proteins	1.58008	1.67593	2.06534	2.29968	1.69276	1.39062	1.9287	1.30633	2.44237	2.44223	2.13398	2.05565	1.98677	1.7737	1.66403	1.94592
Genetic information processing	Translation	Ribosome	K02907	large subunit ribosomal protein L30	RP-L30, MRPL30, rpmD	RP_large_subunit_P	ribosomal proteins	0.225917	0.242936	0.339993	0.338497	0.179123	0.174209	0.193718	0.150237	0.388234	0.444533	0.298609	0.343163	0.216749	0.202536	0.214991	0.256743
Genetic information processing	Translation	Ribosome	K02909	large subunit ribosomal protein L31	RP-L31, rpmE	RP_large_subunit_P	ribosomal proteins	1.11914	1.16299	1.08371	1.55718	1.21682	1.04424	1.25768	1.46161	1.16991	1.27662	1.90462	1.47174	1.16306	1.31778	1.13274	1.04302
Genetic information processing	Translation	Ribosome	K02911	large subunit ribosomal protein L32	RP-L32, MRPL32, rpmF	RP_large_subunit_P	ribosomal proteins	0.583796	0.657965	0.64596	0.725521	0.700079	0.637748	0.854139	0.727368	0.853238	0.96078	0.811844	0.694307	0.728653	0.829538	0.638221	0.689997
Genetic information processing	Translation	Ribosome	K02913	large subunit ribosomal protein L33	RP-L33, MRPL33, rpmG	RP_large_subunit_P	ribosomal proteins	0.48101	0.585297	0.490681	0.643049	0.62693	0.563887	0.752405	0.715917	0.929459	0.89938	0.726878	0.705613	0.613921	0.606317	0.464877	0.585695
Genetic information processing	Translation	Ribosome	K02914	large subunit ribosomal protein L34	RP-L34, MRPL34, rpmH	RP_large_subunit_P	ribosomal proteins	0.697825	0.654317	0.674585	0.745363	0.637246	0.67748	0.831672	0.721871	0.716698	0.777073	0.890426	0.827316	0.784959	0.727838	0.740276	0.766791
Genetic information processing	Translation	Ribosome	K02916	large subunit ribosomal protein L35	RP-L35, MRPL35, rpmI	RP_large_subunit_P	ribosomal proteins	0.507509	0.489521	0.478259	0.502247	0.530335	0.502252	0.647704	0.61927	0.639654	0.652309	0.441529	0.51142	0.52704	0.516252	0.446492	0.456751
Genetic information processing	Translation	Ribosome	K02919	large subunit ribosomal protein L36	RP-L36, MRPL36, rpmJ	RP_large_subunit_P	ribosomal proteins	0.387056	0.486177	0.418848	0.551731	0.363404	0.381019	0.45441	0.447047	0.458972	0.499055	0.735227	0.529376	0.457111	0.408089	0.367324	0.38053
Genetic information processing	Translation	Ribosome	K02926	large subunit ribosomal protein L4	RP-L4, MRPL4, rplD	RP_large_subunit_P	ribosomal proteins	1.14939	1.2539	1.55468	1.68699	1.09349	0.94185	1.24581	0.764469	1.63409	1.59884	1.5844	1.54956	1.4237	1.26693	1.19089	1.37799
Genetic information processing	Translation	Ribosome	K02931	large subunit ribosomal protein L5	RP-L5, MRPL5, rplE	RP_large_subunit_P	ribosomal proteins	0.806769	0.868064	1.21388	1.21797	0.706644	0.667292	0.852443	0.564763	1.61984	1.72852	0.958202	1.2596	0.790408	0.664492	0.652103	0.90118
Genetic information processing	Translation	Ribosome	K02933	large subunit ribosomal protein L6	RP-L6, MRPL6, rplF	RP_large_subunit_P	ribosomal proteins	0.86298	0.935259	1.32703	1.31263	0.790579	0.696836	0.871094	0.645378	1.71635	1.98149	1.03973	1.33807	0.858823	0.796356	0.752657	0.930121
Genetic information processing	Translation	Ribosome	K02935	large subunit ribosomal protein L7/L12	RP-L7, MRPL12, rplL	RP_large_subunit_P	ribosomal proteins	1.13761	1.60904	1.61166	2.27864	2.02193	1.57552	2.05332	1.69887	2.80538	3.77681	2.98708	2.22524	1.44943	2.21239	1.47492	1.26108
Genetic information processing	Translation	Ribosome	K02939	large subunit ribosomal protein L9	RP-L9, MRPL9, rplI	RP_large_subunit_P	ribosomal proteins	0.692204	0.719688	0.739127	0.908874	0.933127	0.799732	0.854562	0.807525	1.1891	1.46573	0.940521	0.911444	0.800095	1.51859	0.834452	0.76106
Genetic information processing	Translation	Ribosome	K02945	small subunit ribosomal protein S1	RP-S1, rpsA	RP_small_subunit_P	ribosomal proteins	3.31059	3.56317	3.219	3.88004	4.38101	4.19732	4.36904	4.77003	4.39862	4.86677	4.46195	4.07806	4.20572	5.49391	4.35949	4.04772
Genetic information processing	Translation	Ribosome	K02946	small subunit ribosomal protein S10	RP-S10, MRPS10, rpsJ	RP_small_subunit_P	ribosomal proteins	0.707729	0.7732	0.842556	1.02481	0.810742	0.753887	1.01649	0.818518	1.21241	1.23045	0.866851	1.04379	0.836725	0.771362	0.673865	0.829544
Genetic information processing	Translation	Ribosome	K02948	small subunit ribosomal protein S11	RP-S11, MRPS11, rpsK	RP_small_subunit_P	ribosomal proteins	1.24843	1.32232	1.34404	1.46347	1.1718	1.18635	1.39502	1.12861	1.35855	1.40629	1.57065	1.46775	1.36195	1.2721	1.3845	1.333
Genetic information processing	Translation	Ribosome	K02950	small subunit ribosomal protein S12	RP-S12, MRPS12, rpsL	RP_small_subunit_P	ribosomal proteins	1.35577	1.39742	1.27437	1.62675	1.49769	1.53223	1.83544	1.48863	1.95982	1.91665	1.72388	1.71382	1.64802	1.68622	1.60324	1.44275
Genetic information processing	Translation	Ribosome	K02952	small subunit ribosomal protein S13	RP-S13, rpsM	RP_small_subunit_P	ribosomal proteins	1.26048	1.39134	1.36618	1.49049	1.22479	1.27906	1.55144	1.42267	1.43614	1.59541	1.73468	1.48771	1.4016	1.21048	1.40664	1.36624
Genetic information processing	Translation	Ribosome	K02954	small subunit ribosomal protein S14	RP-S14, MRPS14, rpsN	RP_small_subunit_P	ribosomal proteins	0.447818	0.508372	0.676206	0.633247	0.43374	0.443673	0.51757	0.349943	0.824449	0.92394	0.477382	0.632125	0.441672	0.307252	0.355693	0.467066
Genetic information processing	Translation	Ribosome	K02956	small subunit ribosomal protein S15	RP-S15, MRPS15, rpsO	RP_small_subunit_P	ribosomal proteins	1.03054	0.914888	0.895486	1.18139	1.29747	1.23525	1.58153	1.69795	1.41283	1.7688	1.26663	1.30083	1.14399	1.70777	1.04081	1.05419
Genetic information processing	Translation	Ribosome	K02959	small subunit ribosomal protein S16	RP-S16, MRPS16, rpsP	RP_small_subunit_P	ribosomal proteins	0.664099	0.643371	0.632457	0.659543	0.702893	0.66067	0.830401	0.704466	0.894364	1.03888	0.607533	0.677348	0.655697	0.661044	0.638221	0.700599
Genetic information processing	Translation	Ribosome	K02961	small subunit ribosomal protein S17	RP-S17, MRPS17, rpsQ	RP_small_subunit_P	ribosomal proteins	0.412218	0.453035	0.64461	0.613167	0.425299	0.33008	0.470942	0.315132	0.851319	0.885627	0.485731	0.628468	0.399594	0.421879	0.352316	0.445862
Genetic information processing	Translation	Ribosome	K02963	small subunit ribosomal protein S18	RP-S18, MRPS18, rpsR	RP_small_subunit_P	ribosomal proteins	0.405526	0.476143	0.458275	0.556273	0.516268	0.533324	0.601076	0.568886	0.654186	0.693078	0.490643	0.59721	0.499492	0.571411	0.474257	0.491995
Genetic information processing	Translation	Ribosome	K02965	small subunit ribosomal protein S19	RP-S19, rpsS	RP_small_subunit_P	ribosomal proteins	0.541236	0.637594	0.772343	0.800583	0.524239	0.452842	0.679496	0.431474	1.05421	1.08996	0.772062	0.819668	0.64268	0.537368	0.497519	0.665641
Genetic information processing	Translation	Ribosome	K02967	small subunit ribosomal protein S2	RP-S2, MRPS2, rpsB	RP_small_subunit_P	ribosomal proteins	1.42938	1.47495	1.49905	1.85337	1.78185	1.69064	1.99991	1.8459	1.96256	2.07088	1.77398	1.82389	1.71825	1.63839	1.61938	1.63616
Genetic information processing	Translation	Ribosome	K02968	small subunit ribosomal protein S20	RP-S20, rpsT	RP_small_subunit_P	ribosomal proteins	0.555958	0.497123	0.527138	0.656674	0.697266	0.633164	0.788012	0.847374	0.708198	0.869417	0.686605	0.645759	0.630571	0.920464	0.570684	0.600022
Genetic information processing	Translation	Ribosome	K02970	small subunit ribosomal protein S21	RP-S21, MRPS21, rpsU	RP_small_subunit_P	ribosomal proteins	0.669184	0.825193	0.664863	0.864649	1.15211	1.20622	1.59425	1.55596	1.38432	1.56692	0.637983	0.952677	0.675979	0.820488	0.576312	0.658477
Genetic information processing	Translation	Ribosome	K02982	small subunit ribosomal protein S3	RP-S3, rpsC	RP_small_subunit_P	ribosomal proteins	1.27654	1.34786	1.92519	1.94612	1.12585	0.902627	1.34416	0.802944	2.20438	2.2875	1.60699	1.79462	1.44732	1.21651	1.25618	1.56424
Genetic information processing	Translation	Ribosome	K02986	small subunit ribosomal protein S4	RP-S4, rpsD	RP_small_subunit_P	ribosomal proteins	1.31695	1.53789	1.49041	1.82086	1.47894	1.41405	1.66801	1.45336	1.91129	2.06548	1.85649	1.86179	1.68495	1.68622	1.49256	1.51467
Genetic information processing	Translation	Ribosome	K02988	small subunit ribosomal protein S5	RP-S5, MRPS5, rpsE	RP_small_subunit_P	ribosomal proteins	0.798203	0.902422	1.22198	1.28347	0.713209	0.66882	0.750285	0.55148	1.51346	1.68284	1.05496	1.22535	0.824616	0.736888	0.817943	0.972816
Genetic information processing	Translation	Ribosome	K02990	small subunit ribosomal protein S6	RP-S6, MRPS6, rpsF	RP_small_subunit_P	ribosomal proteins	0.564256	0.57952	0.657572	0.732215	0.687888	0.645898	0.723157	0.646295	0.789903	0.899872	0.652717	0.696302	0.631176	0.718789	0.669362	0.639565
Genetic information processing	Translation	Ribosome	K02992	small subunit ribosomal protein S7	RP-S7, MRPS7, rpsG	RP_small_subunit_P	ribosomal proteins	1.43982	1.51782	1.60167	1.91098	1.54786	1.58265	1.88546	1.52711	2.08676	2.16814	1.73616	1.83586	1.81119	1.71941	1.72931	1.66883
Genetic information processing	Translation	Ribosome	K02994	small subunit ribosomal protein S8	RP-S8, rpsH	RP_small_subunit_P	ribosomal proteins	0.640276	0.703269	0.997295	1.03199	0.618021	0.576113	0.69306	0.50247	1.43148	1.49913	0.803004	1.0122	0.658118	0.516252	0.563555	0.696874
Genetic information processing	Translation	Ribosome	K02996	small subunit ribosomal protein S9	RP-S9, MRPS9, rpsI	RP_small_subunit_P	ribosomal proteins	1.20212	1.14688	1.13016	1.41638	1.34061	1.35954	1.45733	1.2303	1.74541	1.79238	1.45818	1.40258	1.42612	1.71122	1.53496	1.35592
Genetic information processing	Folding, sorting and degradation	RNA degradation	K00850	6-phosphofructokinase 1	pfkA, PFK	RNA_degradosome_typeABCD_combined	RNA degradation	0.0521964	0.0529048	0.0475288	0.0461369	0.0736185	0.0723324	0.0796913	0.0948143	0.0998003	0.0992217	0.0235744	0.0528711	0.0759833	0.0655011	0.0438988	0.055876
Genetic information processing	Folding, sorting and degradation	RNA degradation	K00962	polyribonucleotide nucleotidyltransferase	pnp, PNPT1	RNA_degradosome_typeABCD_combined	RNA degradation	2.33251	2.19494	2.19038	2.55427	2.496	2.45268	2.768	2.36669	2.95919	2.88922	2.81272	2.91589	2.98726	3.18241	3.17309	2.78864
Genetic information processing	Folding, sorting and degradation	RNA degradation	K01689	enolase	ENO, eno	RNA_degradosome_typeABCD_combined	RNA degradation	0.56265	0.501379	0.504724	0.521132	0.607236	0.597507	0.606163	0.920661	0.607027	0.615469	0.488187	1.27589	0.717452	0.556329	1.24192	0.998605
Genetic information processing	Folding, sorting and degradation	RNA degradation	K03628	transcription termination factor Rho	rho	RNA_degradosome_typeABCD_combined	RNA degradation	1.63763	1.89119	1.60842	1.97767	1.73777	1.85772	1.99864	1.98148	1.93816	1.79827	2.31471	2.08691	2.03551	1.81636	1.91466	1.86196
Genetic information processing	Folding, sorting and degradation	RNA degradation	K03654	ATP-dependent DNA helicase RecQ	recQ	RNA_degradosome_typeABCD_combined	RNA degradation	0.353329	0.331719	0.340533	0.353796	0.353557	0.401394	0.358187	0.382005	0.322158	0.291771	0.400765	0.400357	0.388393	0.43136	0.393588	0.417208
Genetic information processing	Folding, sorting and degradation	RNA degradation	K03732	ATP-dependent RNA helicase RhlB	rhlB	RNA_degradosome_typeABCD_combined	RNA degradation	0.0382773	0.0334456	0.0459085	0.0267738	0.0323546	0.0249598	0.0288245	0.0242761	0.0463359	0.0520668	0.0211188	0.0279319	0.0269423	0.0228392	0.0378955	0.0237831
Genetic information processing	Folding, sorting and degradation	RNA degradation	K05592	ATP-dependent RNA helicase DeaD	deaD, cshA	RNA_degradosome_typeABCD_combined	RNA degradation	0.476727	0.53969	0.495812	0.618665	0.45062	0.522118	0.537917	0.621102	0.385218	0.424394	0.675309	0.490471	0.590611	0.453337	0.482136	0.547585
Genetic information processing	Folding, sorting and degradation	RNA degradation	K08300	ribonuclease E	rne	RNA_degradosome_typeABCD_combined	RNA degradation	0.362966	0.349354	0.449633	0.388459	0.459999	0.478311	0.50231	0.443841	0.42278	0.416534	0.350178	0.422304	0.457413	0.378355	0.407095	0.491709
Genetic information processing	Folding, sorting and degradation	RNA degradation	K11927	ATP-dependent RNA helicase RhlE	rhlE	RNA_degradosome_typeABCD_combined	RNA degradation	0.392677	0.32503	0.390493	0.435313	0.47641	0.56185	0.651095	0.505676	0.503937	0.483337	0.322184	0.476505	0.72835	0.547279	0.53654	0.478814
Genetic information processing	Folding, sorting and degradation	RNA degradation	K12573	ribonuclease R	rnr, vacB	RNA_degradosome_typeABCD_combined	RNA degradation	0.267406	0.291584	0.3778	0.327022	0.263526	0.262332	0.288669	0.236349	0.295288	0.27114	0.278473	0.29661	0.282137	0.224083	0.279151	0.326946
Genetic information processing	Folding, sorting and degradation	RNA degradation	K12574	ribonuclease J	rnj	RNA_degradosome_typeABCD_combined	RNA degradation	0.486096	0.421414	0.349715	0.387502	0.34793	0.41311	0.388707	0.419565	0.390153	0.393939	0.430724	0.435272	0.497978	0.516252	0.556051	0.481393
Genetic information processing	Folding, sorting and degradation	RNA degradation	K18682	ribonucrease Y	rny	RNA_degradosome_typeABCD_combined	RNA degradation	0.375546	0.344793	0.239534	0.246701	0.284627	0.350965	0.341655	0.346278	0.367945	0.320751	0.258336	0.293617	0.362056	0.350776	0.412348	0.344139
Genetic information processing	Folding, sorting and degradation	RNA degradation	K04077	chaperonin GroEL	groEL, HSPD1	GroEL	protein folding	3.21209	5.3221	10.6046	10.0098	4.8124	3.78777	4.23763	4.86347	7.56865	9.78168	8.24024	7.71619	3.73741	4.58206	6.81069	5.71998
Genetic information processing	Folding, sorting and degradation	RNA degradation	K04043	molecular chaperone DnaK	dnaK, HSPA9	DnaK	protein folding	3.51643	4.8943	9.17468	6.48523	3.74095	2.54182	3.76245	3.86128	3.67397	4.21888	6.5532	4.91901	3.54458	3.0471	6.5184	5.47012
Genetic information processing	Folding, sorting and degradation	Protein export	K03070	preprotein translocase subunit SecA	secA	Sec_dependent_pathway_P	protein export	2.6655	2.68021	3.5706	2.9597	2.32203	1.98965	2.42126	2.39143	2.45114	2.34006	3.17125	3.09645	2.73873	2.33606	3.11681	3.33795
Genetic information processing	Folding, sorting and degradation	Protein export	K03071	preprotein translocase subunit SecB	secB	Sec_dependent_pathway_P	protein export	0.086994	0.11037	0.129894	0.119287	0.137859	0.125308	0.125895	0.117716	0.104461	0.115431	0.0888952	0.0990917	0.0874868	0.0715341	0.0626589	0.0971383
Genetic information processing	Folding, sorting and degradation	Protein export	K03072	preprotein translocase subunit SecD	secD	Sec_dependent_pathway_P	protein export	0.887606	0.9383	0.864431	0.964573	0.820589	0.81807	0.893984	0.775004	1.13783	1.11649	0.951817	1.00588	0.871538	0.74723	0.818318	0.892583
Genetic information processing	Folding, sorting and degradation	Protein export	K03073	preprotein translocase subunit SecE	secE	Sec_dependent_pathway_P	protein export	0.545519	0.546075	0.569536	0.566552	0.551436	0.56185	0.612521	0.49789	0.693119	0.700937	0.66254	0.629133	0.606958	0.4361	0.495643	0.575953
Genetic information processing	Folding, sorting and degradation	Protein export	K03074	preprotein translocase subunit SecF	secF	Sec_dependent_pathway_P	protein export	0.608155	0.641851	0.561164	0.606474	0.487195	0.474236	0.675681	0.466285	0.75097	0.778546	0.653699	0.652742	0.508574	0.389559	0.434485	0.52065
Genetic information processing	Folding, sorting and degradation	Protein export	K03075	preprotein translocase subunit SecG	secG	Sec_dependent_pathway_P	protein export	0.389733	0.370334	0.344044	0.404714	0.329642	0.389169	0.430248	0.406282	0.398927	0.437656	0.464121	0.423301	0.382338	0.336555	0.398466	0.383968
Genetic information processing	Folding, sorting and degradation	Protein export	K03076	preprotein translocase subunit SecY	secY	Sec_dependent_pathway_P	protein export	1.59266	1.62971	2.19173	2.3745	1.36171	1.32898	1.51329	1.19732	2.9633	3.38925	1.82162	2.40381	1.45549	1.08594	1.05582	1.49232
Genetic information processing	Folding, sorting and degradation	Protein export	K12257	SecD/SecF fusion protein	secDF	Sec_dependent_pathway_P	protein export	0.28534	0.317125	0.311368	0.335867	0.375595	0.375416	0.437455	0.395747	0.427716	0.490705	0.265703	0.360122	0.460743	0.349914	0.337308	0.462195
Genetic information processing	Folding, sorting and degradation	Protein export	K03210	preprotein translocase subunit YajC	yajC	Sec_dependent_pathway_P	protein export	0.246528	0.224085	0.219821	0.259132	0.261651	0.256729	0.312407	0.284443	0.313384	0.351697	0.252934	0.258037	0.239151	0.199951	0.198482	0.238691
Genetic information processing	Folding, sorting and degradation	Protein export	K03217	YidC/Oxa1 family membrane protein insertase	yidC, spoIIIJ, OXA1, ccfA	Sec_dependent_pathway_P	protein export	0.718436	0.761343	0.726165	0.779069	0.620365	0.590885	0.721885	0.596368	0.688184	0.723041	0.794654	0.726562	0.749541	0.53823	0.633718	0.784556
